# Supplementary material for: Last Glacial Maximum extent and subsequent retreat of the East Antarctic Ice Sheet from the Mac. Robertson Shelf
Source: Copernicus journal article supplement (doi:10.5194/egusphere-2025-2515), 2025-07-10
Supplement: Supplementary file 1 [file Table S1_AMS_ages_and_RPO.pdf › Table S1_AMS_ages_and_RPO.pdf]

**Table S1: Full list of all measured conventional and calibrated radiocarbon ages and full description of Ramped Pyrolysis Oxidization (RPO).**

| Core Nr./<br>position  | Depth<br>(cmbsf) | Carbonate<br>source     | Conventional<br>radiocarbon<br>ages<br>( <sup>14</sup> C ka BP) ±<br>error | Marine20<br>calibration<br>Age range (cal ka<br>BP) 2 sigma<br>rounded | Median<br>(cal ka BP) rounded |
|------------------------|------------------|-------------------------|----------------------------------------------------------------------------|------------------------------------------------------------------------|-------------------------------|
| <b>PS128_4<br/>4-1</b> | 6                | Benthic<br>foraminifers | 1,583 ±71                                                                  | 200-500                                                                | 400                           |
| Outer<br>shelf         | 106              | Benthic<br>foraminifers | 14,095 ±142                                                                | 14,500-15,500                                                          | 15,000                        |
| NB                     | 147              | Benthic<br>foraminifers | 14,356 ±149                                                                | 14,900-15,800                                                          | 15,400                        |
| <b>PS128_4<br/>6-1</b> | 192              | Benthic<br>foraminifers | 11,625 ±135                                                                | 11,900-12,600                                                          | 12,300                        |
| Outer<br>shelf         | 220              | Benthic<br>foraminifers | 11,629±116                                                                 | 11,900-12,600                                                          | 12,300                        |
| IA                     | 228              | Benthic<br>foraminifers | 11,606 ±106                                                                | 11,900-12,600                                                          | 12,300                        |
|                        | <b>243</b>       | Benthic<br>foraminifers | 12,487 ±111                                                                | 12,700-13,200                                                          | 12,900                        |

Ramped-Pyrolysis-Oxidation (RPO) <sup>14</sup>C ages were determined using a modified SoliTOC Cube Carbon Analyzer (Elementar Analysensysteme GmbH, Germany) located at the radiocarbon dating facility of the Alfred Wegener Institute (AWI) in Bremerhaven. 100 mg of ground, freeze-dried sediment was weighted into pre-combusted (6h at 900°C) ceramic crucibles, acidified with 3 drops of 0.5 M HCl and placed on a heating plate at 60°C for 1h to remove inorganic carbon. This procedure was repeated two more times and the sediment was allowed to dry completely before analysis. RPO was conducted in pyrolysis mode (oxygen-free conditions) with a heating rate of 15°C/min. Based on the shape of the thermograms (evolved CO<sub>2</sub> over temperature) the temperature limit for an appropriate fraction was determined such that the upper temperature limit was as low as possible while including a total amount of 80-100 µgC. For the trapping run, an appropriate amount of sediment was weighted in, prepared and analysed as described above. During this second run, all CO<sub>2</sub> produced between the onset of the heating phase and 290°C was collected on a self-constructed zeolite trap system and subsequently <sup>14</sup>C-analysed using AWI's Mini CArbon DAting System (MICADAS 15; Ionplus AG, Switzerland) applying the standard gas measurement method. The data were blank corrected against blank and modern CO<sub>2</sub> reference gases (Mollenhauer et al., 2021).
